# Supplementary material
Source: publisher figshare collection journal article supplement (https://karger.figshare.com/ndownloader/files/16499321)
Supplement: Supplementary file 1 [file 16499321]

**Supplementary Table 2: Classification of Focus of Included Articles**

|  | **Main Focus** | **Addressed but not Main Focus** | **Mentioned but no Focus** |
| --- | --- | --- | --- |
| **Primary Study** | The primary study was conducted to address overdiagnoses as defined explicitly or implicitly by the author(s) of the study. | The primary study included a section of results on overdiagnosis, as defined explicitly or implicitly by the author(s) of the study, or conducted analyses that were discussed in the context of overdiagnosis, but overdiagnosis was not the main focus of the study. | The author(s) of the primary study mentioned overdiagnosis in abstract, introduction, or discussion text, but only mentioned it as context. No focused analyses or results addressed or were discussed at any extent in the context of overdiagnosis. |
| **Systematic Review** | The systematic review primarily addressed overdiagnosis as defined explicitly or implicitly by the author(s) of the review. | The systematic review included a section of evidence on overdiagnosis, as defined explicitly or implicitly by the author(s) of the review, or presented evidence that was discussed in the context of overdiagnosis, but overdiagnosis was not the main focus of the review. | The author(s) of the systematic review mentioned overdiagnosis in abstract, introduction, or discussion text, but only mentioned it as context. No section of evidence or discussion in the review focused on overdiagnosis. |
| **Narrative Review** | The narrative review primarily addressed overdiagnosis as defined explicitly or implicitly by the author(s) of the review. | The narrative review included a section of evidence or discussion of overdiagnosis, as defined explicitly or implicitly by the author(s) of the review, but overdiagnosis was not the main focus of the review. | The author(s) of the narrative review mentioned overdiagnosis in abstract, introduction, or discussion text, but only mentioned it as context. No section of evidence or discussion in the review focused on overdiagnosis. |
| **Commentary or letter** | The commentary or letter primarily addressed overdiagnosis as defined explicitly or implicitly by the author(s) of the commentary. | The commentary or letter included a section (e.g., a paragraph) on overdiagnosis, as defined explicitly or implicitly by the author(s) of the review, but overdiagnosis was not the main focus of the review. | The author(s) of the commentary or letter mentioned overdiagnosis in the text, but only mentioned it as context. There was not a focus on overdiagnosis. |
